# Supplementary material
Source: publisher figshare collection journal article supplement (https://acs.figshare.com/ndownloader/files/24149317)
Supplement: Supplementary file 1 [file 24149317]

# Supporting Information

## Visualization of Pathway Usage in an Extended Carbohydrate Conversion Network Reveals the Impact of Solvent Enabled Proton Transfer

*Pernille R. Jensen,<sup>‡</sup> Rikke K. Knudsen,<sup>§</sup> and Sebastian Meier<sup>§\*</sup>*

<sup>‡</sup>Technical University of Denmark, Department of Health Technology, Ørstedes Plads 349, 2800-Kgs. Lyngby, Denmark

<sup>§</sup>Technical University of Denmark, Department of Chemistry, Kemitorvet Building 207, 2800-Kgs. Lyngby, Denmark

\*Email [semei@kemi.dtu.dk](mailto:semei@kemi.dtu.dk)

SI Contents (16 pages, 15 figures):

|                                                                                          |     |
|------------------------------------------------------------------------------------------|-----|
| NMR spectra after catalyst screening (Fig S1):                                           | S2  |
| Plausible function of the Sn(IV) metal center (Fig S2):                                  | S3  |
| Spectra showing minor aldose species with same kinetic profile as erythrulose (Fig S3):  | S4  |
| HMBC NMR of cyclic 3-deoxythreosone (Fig S4):                                            | S5  |
| Time series of <sup>13</sup> C NMR signals for <b>6</b> and <b>9</b> at 333 K (Fig S5):  | S6  |
| Kinetic profiles of VGA and formic acid (Fig S6):                                        | S7  |
| Reaction progress curves at varying water content in DMSO (Fig S7)                       | S8  |
| Time series for 3-deoxythreosone intermediates (Fig S8):                                 | S9  |
| <sup>13</sup> C NMR spectra of post reaction material with added Brønsted acid (Fig S9): | S10 |
| Time series of erythropyrone formation (Fig S10):                                        | S11 |
| Temperature effect on kinetics and composition (Fig S11):                                | S12 |
| Photographs of samples showing temperature and water effect on humin formation (Fig S12) | S13 |
| Kinetic fit in the absence of added water (Fig S13):                                     | S14 |
| Kinetic fit in the presence of 15% (v/v) water (Fig S14):                                | S15 |
| Reaction progress in various alcohols and aprotic polar solvents (Fig S15):              | S16 |

**Supplementary Figures:**

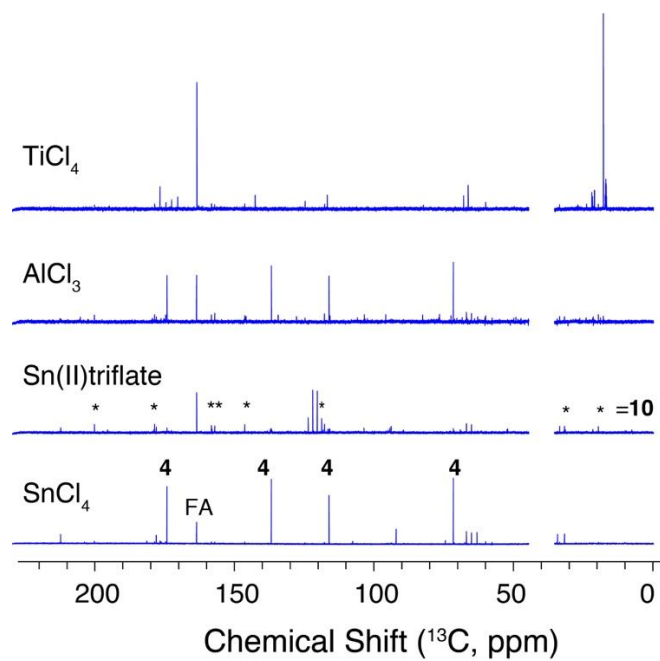

**Figure S1.** Post-reaction material upon conversion of erythrulose (40 mg) by various Lewis acidic salts (12:1 substrate to catalyst ratio) at 353 K in  $\text{d}_6\text{-DMSO}$  (550  $\mu\text{l}$ ), overnight.

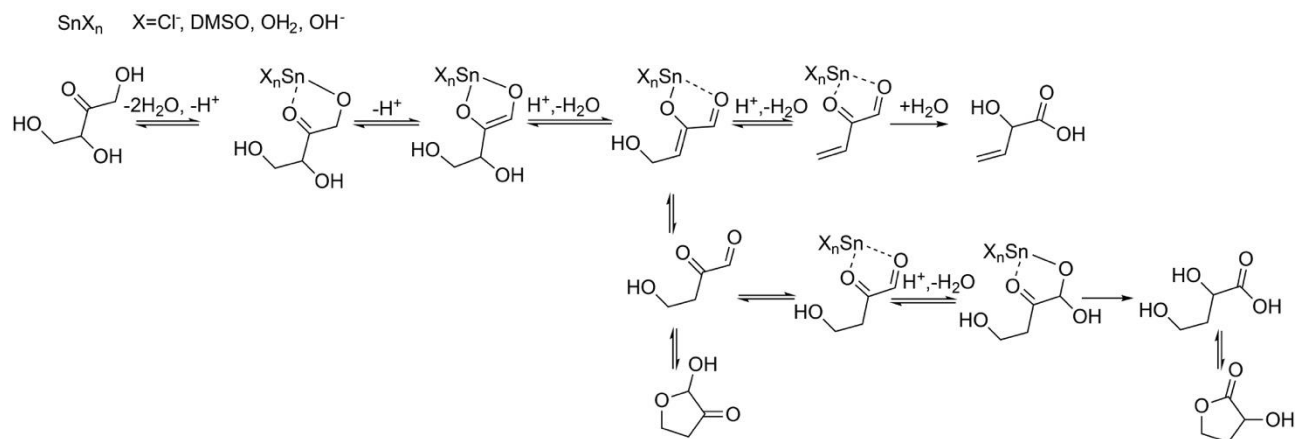

**Figure S2.** Plausible function of the  $\text{Sn(IV)}$  catalyst center in the reaction pathway. Complexes between the metal center and the substrate or intermediates remain to be experimentally characterized, as transient binding and low complex populations necessitate future method developments.

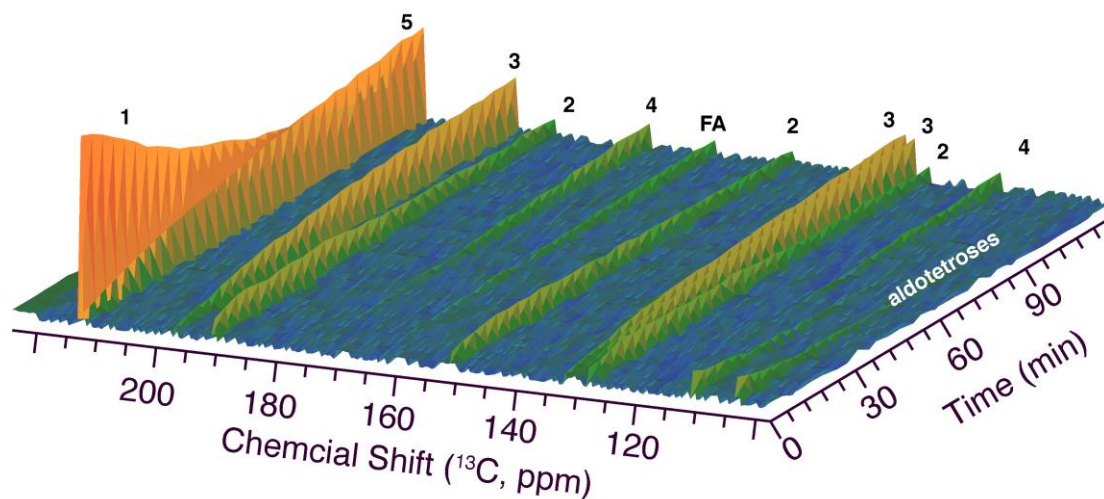

**Figure S3.** Time course of erythrulose conversion depicting aldotetrose (erythrose and threose) signals alongside other chemicals. Minor populations of aldotetroses share the kinetic profile of the ketose substrate **1**. All tetrose species were therefore treated as an interconverting pool and the integrals were summed up for the reaction progress curves of substrate conversion. FA denotes formic acid. Reaction conditions: L-erythrulose (40 mg) and  $\text{SnCl}_4 \cdot 5\text{H}_2\text{O}$  (10 mg) in  $\text{d}_6\text{-DMSO}$  (550  $\mu\text{L}$ ) at 313 K without addition of water.

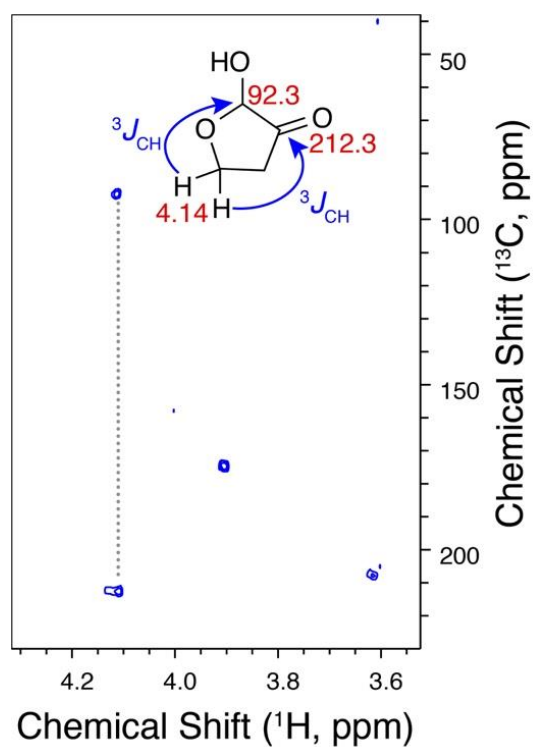

**Figure S4.**  $^1\text{H}$ - $^{13}\text{C}$  HMBC of a reaction mixture, showing the cyclic structure of the predominant 3-deoxythreosone compound **5**. Long range connections from H4 to hemiacetal and keto group via  $^3J_{\text{CH}}$  couplings are shown and indicated by blue arrows. Reaction conditions: L-erythrulose (40 mg) and  $\text{SnCl}_4 \cdot 5\text{H}_2\text{O}$  (10 mg) in  $d_6$ -DMSO (550  $\mu\text{l}$ ) at 313 K, overnight.

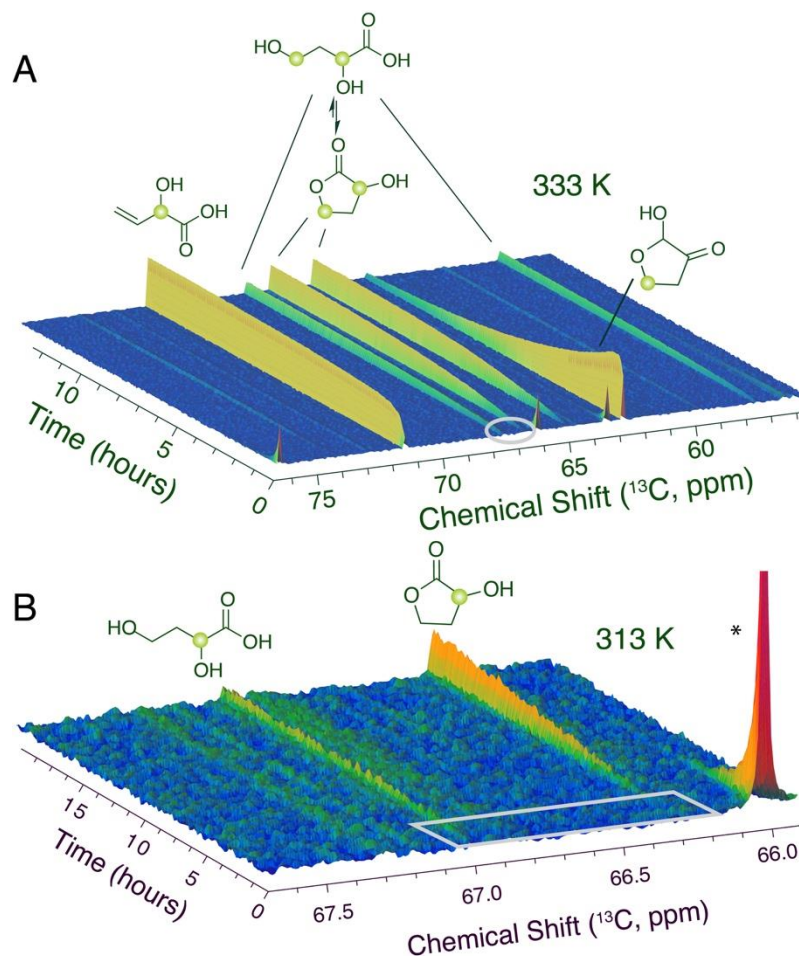

**Figure S5.** Time series of  $^{13}\text{C}$  NMR spectra of cyclic and acyclic  $\alpha$ -hydroxyesters **6** and **9** at 333 K (A) and 313 K (B). Signals of erythrulose substrate are labelled by asterisks. Spectra show that the acyclic compound **9** is detectable prior to the equilibration with its cyclic counterpart **6** at both temperatures (highlighted by grey boxes). Reaction conditions: L-erythrulose (40 mg) and  $\text{SnCl}_4 \cdot 5\text{H}_2\text{O}$  (10 mg) in  $\text{d}_6\text{-DMSO}$  (550  $\mu\text{L}$ ) at 333 K or 313 K.

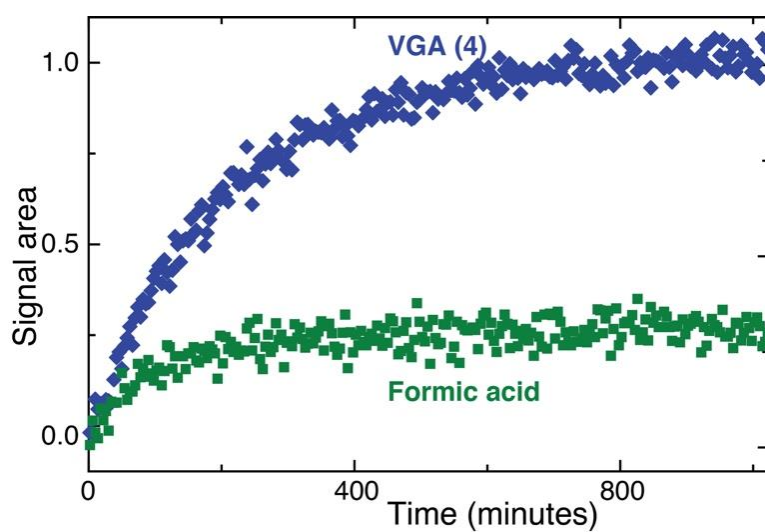

**Figure S6.** Kinetic profiles of VGA and formic acid formation indicate that formic acid may form in competition with the formation of VGA from vinylglyoxal (**3**). Such a mechanism parallels the proposed mechanism for the conversion of a  $\beta$ ,  $\gamma$ -unsaturated  $\alpha$ -hydroxy-carbonyl intermediate in the conversion of HMF to levulinic acid and formic acid. Reaction conditions: L-erythrulose (40 mg),  $\text{SnCl}_4 \cdot 5\text{H}_2\text{O}$  (10 mg) in  $\text{d}_6$ -DMSO/ $\text{D}_2\text{O}$  (85%/15% v/v, total 550  $\mu\text{L}$ ) at 313 K.

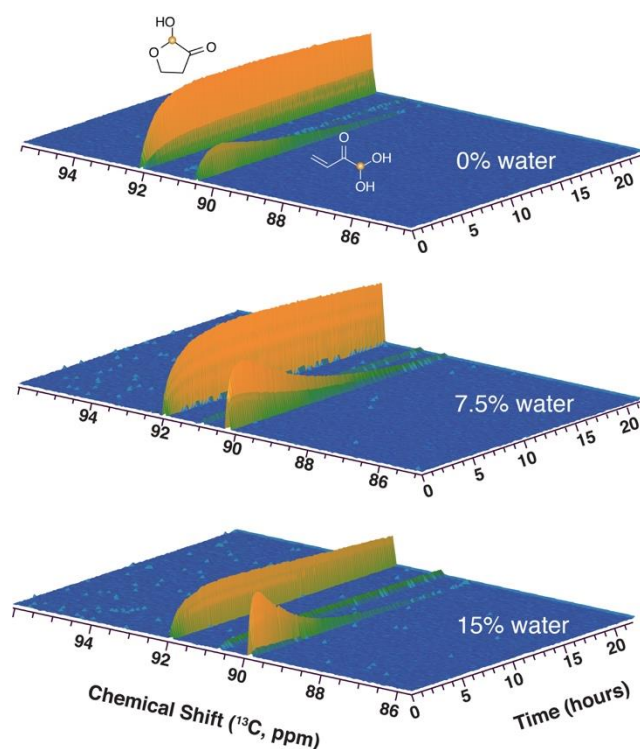

**Figure S7.** Reaction progress curves towards intermediates **3** and **5** at varying water content in DMSO. Experiments correspond to the experiments of main text Figure 6. Kinetic profiles indicate that **3** and **5** form in parallel in the absence of added water, while the addition of water favors a more rapid flux towards the hydrate of vinylgloxal **3**. Changes in reaction profiles are consistent with a change of reaction control at the branch point (**2** to **3** or **5**) from predominantly kinetic control (in the absence of water) to predominantly thermodynamic control (upon addition of water). Reaction conditions: L-erythrulose (27 mg) and  $\text{SnCl}_4 \cdot 5\text{H}_2\text{O}$  (10 mg) in  $\text{d}_6$ -DMSO/ $\text{D}_2\text{O}$  of the indicated ratio (v/v added water, total 550  $\mu\text{L}$ ) at 313 K.



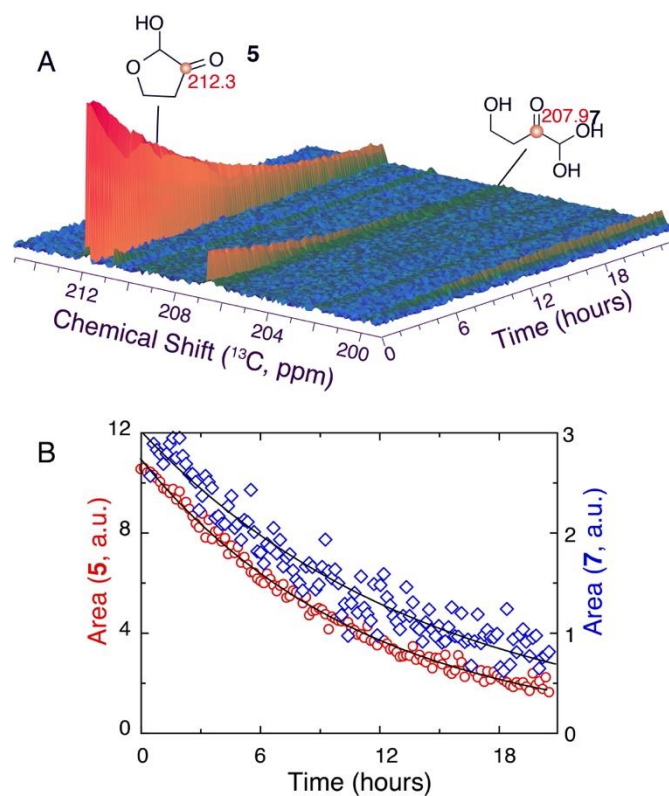

**Figure S8.** Series of  $^{13}\text{C}$  NMR spectra (A) and corresponding signal areas (B) for cyclic and acyclic 3-deoxythreosone intermediates **5** and **7** at varying water content in DMSO. Time series data indicate conversion with comparable kinetics due to equilibration of both forms under the reaction conditions, indicating that **7** is formed from **5**, not from rehydration of **3**. Reaction conditions: L-erythrulose (40 mg), and  $\text{SnCl}_4 \cdot 5\text{H}_2\text{O}$  (10 mg) in  $\text{d}_6\text{-DMSO}/\text{D}_2\text{O}$  (30% added water, total 550  $\mu\text{L}$ ) at 333 K.

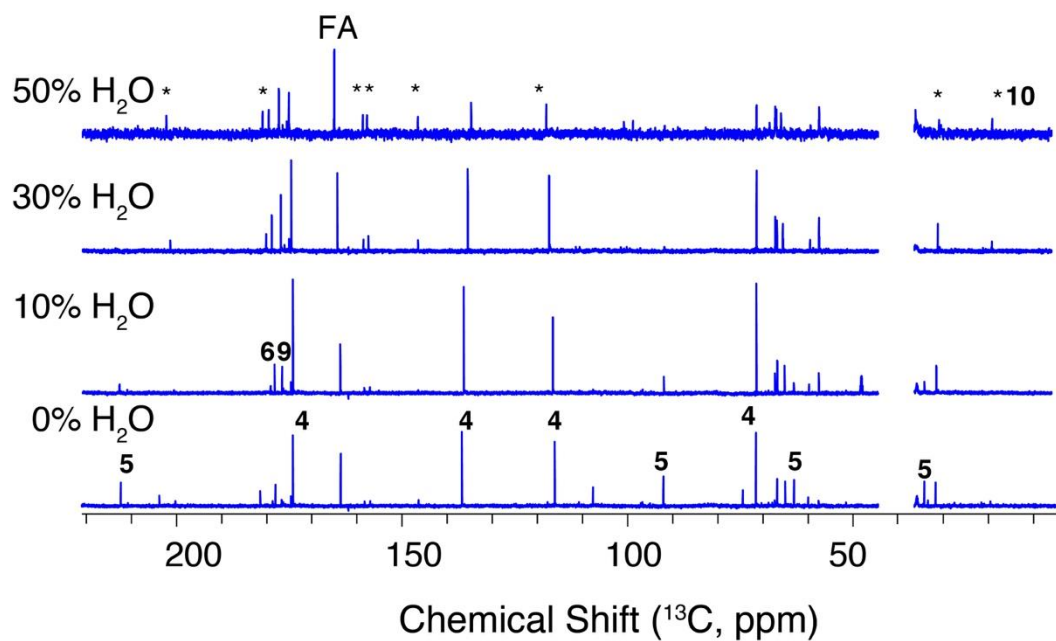

**Figure S9.**  $^{13}\text{C}$  NMR spectra of post reaction material for reactions with varying water content and added Brønsted acid. Reaction conditions: L-erythrulose (40 mg) and  $\text{SnCl}_4 \cdot 5\text{H}_2\text{O}$  (10 mg) in  $\text{d}_6$ -DMSO/ $\text{D}_2\text{O}$  (v/v as indicated, 550  $\mu\text{L}$ ) at 363 K for 90 minutes. Asterisks indicate erythropyrone (10) signals.

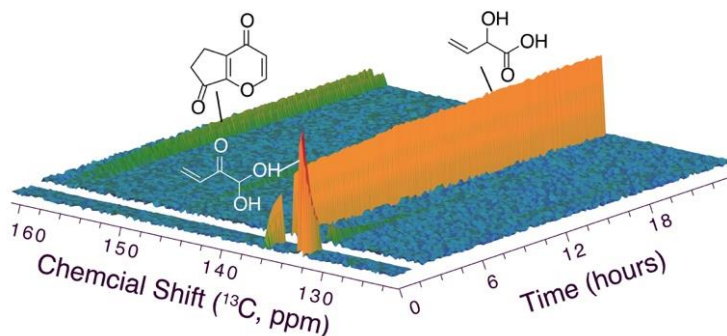

**Figure S10.** Time series of  $^{13}\text{C}$  NMR spectra showing the kinetics of erythropyrene formation upon accumulation of acidic product with a slow kinetics similar to the kinetics of oligomerization deduced in main text Figure 4. The experiment was interrupted after 80 minutes in order to acquire assignment spectra and validate structure determinations. Reaction conditions: L-erythrulose (40 mg) and  $\text{SnCl}_4 \cdot 5\text{H}_2\text{O}$  (10 mg) in  $\text{d}_6\text{-DMSO}/\text{D}_2\text{O}$  (30% added water in a total volume of 550  $\mu\text{L}$ ) at 333 K.

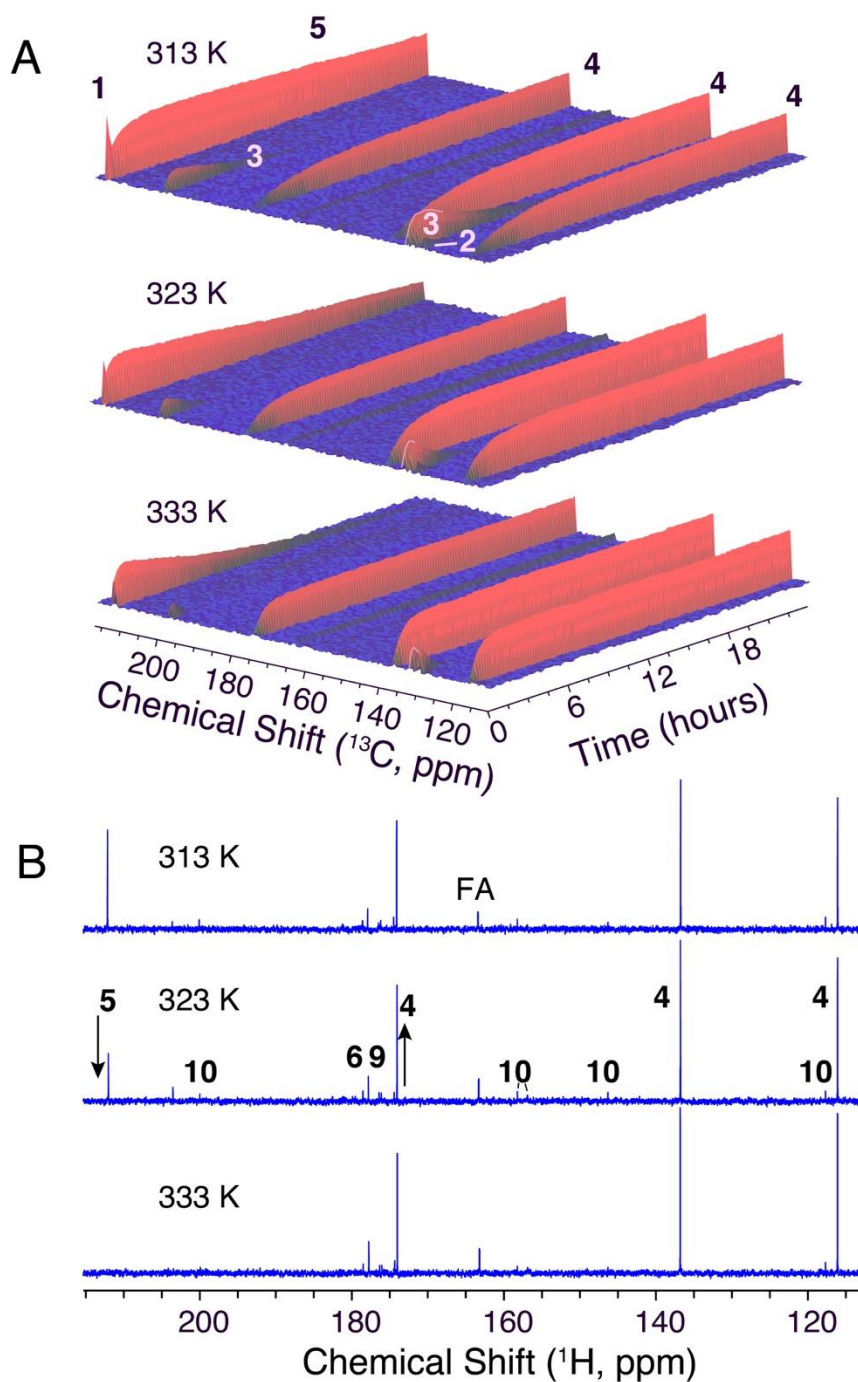

**Figure S11.** Series of  $^{13}\text{C}$  NMR spectra (A) and  $^{13}\text{C}$  NMR spectra of post reaction material (B) at varying temperature. Reaction conditions: L-erythrulose (40 mg) and  $\text{SnCl}_4 \cdot 5\text{H}_2\text{O}$  (10 mg) in  $\text{d}_6$ -DMSO (550  $\mu\text{L}$ ). Spectra of panel (B) are taken after 40 hours (313 K) and 24 hours (323 K and 333 K), respectively.

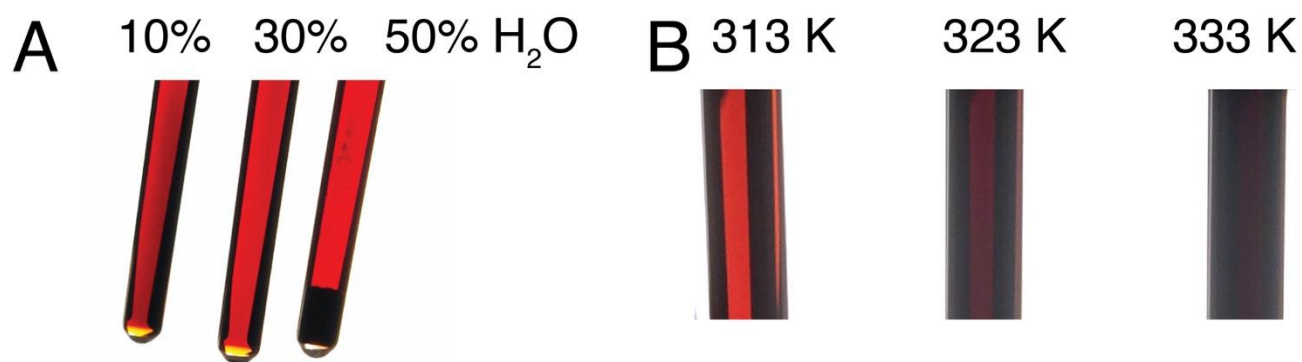

**Figure S12.** Photographs of (A) post-reaction material after the experiments of Figure S9 (water effect) and (B) post-reaction material after the *in situ*-experiments of Figure S11 (temperature effect) show increased humin formation at higher water contents and at higher temperature.

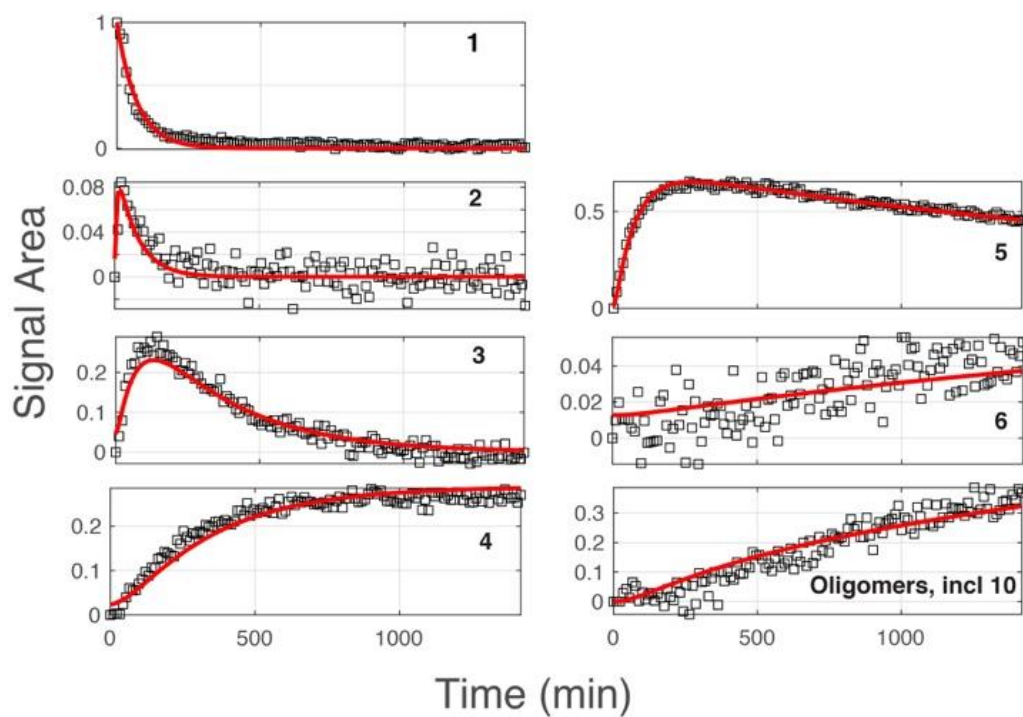

**Figure S13.** Experimental  $^{13}\text{C}$  NMR integrals of compounds **1-6** and a kinetic fit resembling Scheme 1 and Figure 5 shown in red. The figure resembles main text Figure 4, but adjusts the ordinate axis (signal areas) to demonstrate the quality of the fit also for minor molecular species, especially **2** and **6**. Red lines depict from kinetic modelling calculations.

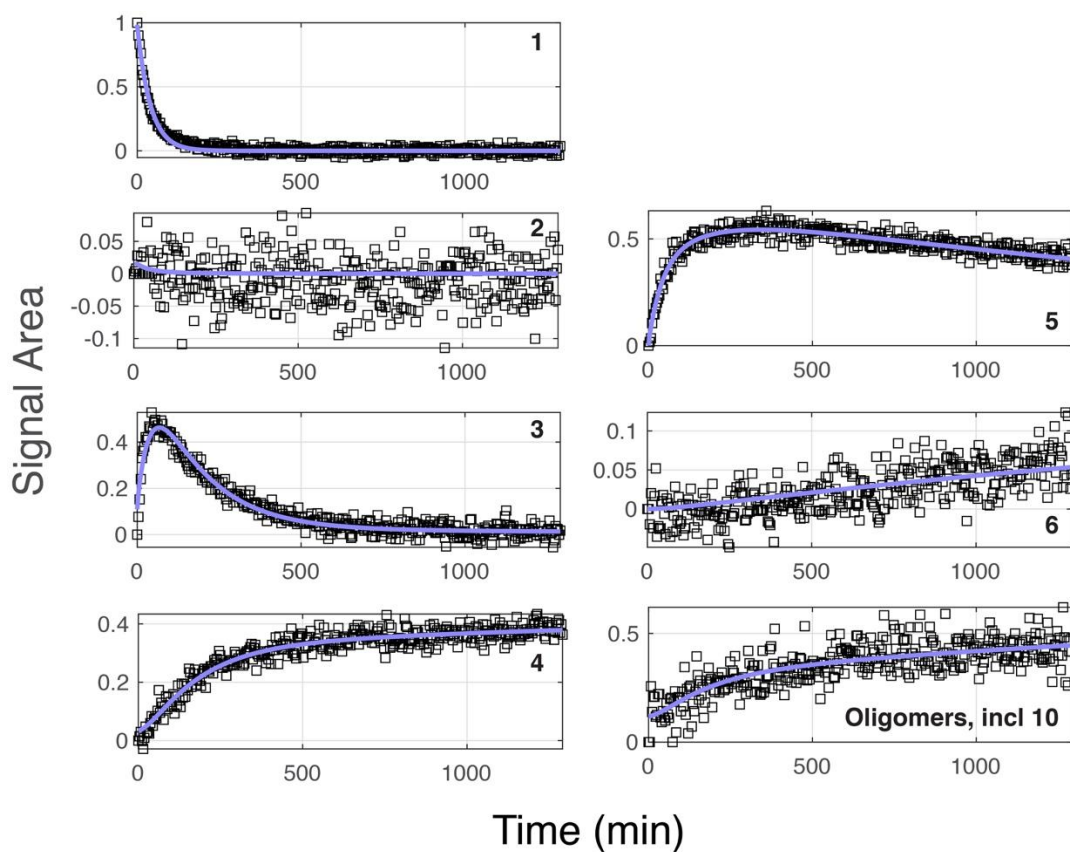

**Figure S14.**  $^{13}\text{C}$  NMR integrals of compounds 1-6 and a kinetic fit (blue curves and blue values in main text Figure 5) using the experimental data of Figure 6 in the presence of 15% (v/v) water. Lines depict kinetic modelling calculations.

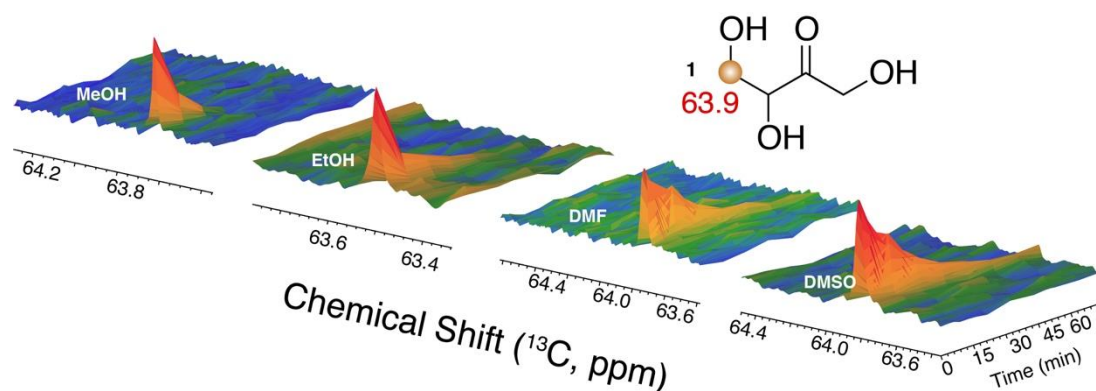

**Figure S15.** Reaction progress in various alcohols and aprotic polar solvents (experiments of main text Figure 8). Conversion of the substrate is shown, indicating a faster conversion in alcohols than in DMF and DMSO. Reaction conditions: L-erythrulose (40 mg) and  $\text{SnCl}_4 \cdot 5\text{H}_2\text{O}$  (10 mg) in 550  $\mu\text{L}$   $\text{d}_6$ -DMSO, protonated DMF containing 5%  $\text{d}_6$ -DMSO, methanol or ethanol containing 5% (v/v)  $\text{d}_4$ -methanol at 333 K.
